# Supplementary material for: Candida albicans biofilm development is governed by cooperative attachment and adhesion maintenance proteins
Source: PubMed Central journal article supplement (PMC6707306; doi:10.1038/s41522-019-0094-5), 2019-08-23
Supplement: 41522_2019_94_MOESM2_ESM.pdf [file 41522_2019_94_MOESM2_ESM.pdf]

## Supplementary Data 1. Amyloid regions of Hyr1

1 MKVVS**NFI****FT** **ILL**TLNLSAA LEVVTSRIDR GGIQGFHGDV KVHSGATWAI  
51 LGTTLCSFFG GLEVEKGASL FIKSDNGPVL ALNVALSTLV RPVINNGVIS  
101 LNSKSSTSFS NFDIGGSSFT NNGEIYLASS GLVKSTAYLY AREWTNGLI  
151 VAYQNQKAAG NIAFGTAYQT ITNNGQICLR HQDFVPATKI KGTGCVTADE  
201 DTWIKLGNTI LSVEPTHNFY LKDSKSSLIV HAVSSNQFTT VHGFNGNKL  
251 GLTLPLTGNR DHFRFEYYPD TGILQLRAAA LPQYFKIGKG YDSKLFRIVN  
301 SRGLKNAVTY DGPVPNNEIP AVCLIPCTNG PSAPES~~ESDL~~ NTPTTSS~~SIET~~  
351 SSYSSAATES SVVSESSSAV DSLTSSSLSS KSESSDVVSS TTNI~~ESSSTA~~  
401 IETTMNSESS TDAGSSSISQ SSSST~~AIT~~S SSETSSSESM SASSTTASNT  
451 SIETDSGIVS QSESSSNALS STEQSITSSP GQSTIYVNST VTSTITSCDE  
501 NKCTEDVVTI FTTVPCSTDC VPTTGDIPMS TSYTQRTVTS TITNCDEVSC  
551 SQDVVYTTN VPHTTVDATT TTTTSTGGDN STGGNESGSN HGSGAGSNEG  
601 SQSGPNNGSG SGSEGGSNNG SGSGSDSGSN NGS~~SGSNNG~~ SGSGSNNGSG  
651 SGSGSTEGSE GGSGSNEGSN HGSNEGS~~SGS~~ SGSQTGSGSG SNN~~SGSGS~~Q  
701 SGSGSGSQSG SESGSNSGSN EGSNPGAGNG SNEGS~~QGSG~~ NGSEAGSGQG  
751 SGPNN~~SGSG~~ HNDGSGSGSN QGSNPGAGSG SGSESGSNAG SHSGSNEGAK  
801 TDSIEGFHTE SKPGFNTGAH TDATVTGNSV ANPVTTSTES DTTISVTVSI  
851 TSYMTGFDGK PKPFTTV~~DVI~~ PVP~~HSMPS~~NT TDSSSSVPTI DTNENGSSIV  
901 TGGKSILFGL IVSMVVLFM

**Supplementary Data 1. The amino acid sequence of Hyr1 with regions predicted to be amyloidogenic regions by Waltz webserver were underlined (<http://waltz.switchlab.org>), and predictions by TANGO were bolded (<http://tango.org.es>). For both analyses, default parameters were used, and only  $\beta$ -aggregation potentials of at least 97% are illustrated.**

## Supplementary Data 2. Synthesized *Sc-CaYWP1* Sequence:

AGCGATCATGTCTAGATGAAGGTTTCCACTATTTTTGCTGCTGCTTCTGCTTTGTTTGCTGCTAC  
TACTACTTTGGCTCAAGATGTTGCTTGCTTGGTTGATAATCAACAAGTTGCCGTTGTTGATTTGG  
ATACTGGTGTGTTGCCCTTTTACTATTCCAGCTTCTTTGGCTGCTTCTTCACTTTCGTTTCTTTG  
GAAGAGTACAACGTCCAATTCTACTACACCATCGTTAACAACGTTAGATACAACACCGATATTAG  
AAACCGCGGTAAGGTTATTAACGTTCCAGCTAGAAAACCTGTATGGTGCTGGTGCTGTTCCATTTT  
TCCAAGTTCATTTGGAAAAGCAGTTGGAAGCTAATTTCTACTGCTGCTATTAGACGTAGATTGATG  
GGTGAAACTCCAATCGTTAAGAGAGATCAAATCGACGATTTTATGTCCTCGAGTGAAAACACTGA  
AGGTACTGCTTTGGAAGGTTCTACATTGGAAGTTGTTGACTATGTTCCAGGTTCTTCTTCTGCTT  
CTCCATCTGGTTCAGCTTCACCATCAGGTTCTGAACTGGTTCGTTAGTGATTCTGCTACCATT  
AGATCTACTACCGTTGTCTCTTCTTCCCTCTTGTGAATCTTCTGGTGATTCTGCTACAGCTAC  
TGGTGCTAATGGTGAATCTACTGTTACTGAACAAAACACCGTTGTTGTTACCATTACCTCTTGTC  
ATAACGATGCTTGTGTCATGCTACTACAGTTCCAGCAACTGCTTCTATTGGTGTTACTACTGTTTCA  
GGTACTGAAACCATTTTCACTACCTACTGTCCATTGTCCCTTACGAAACTGTTGAATCCACCAA  
AGTTATCACTATCACCTCTTGCTCTGAAAACAAGTGTCAAGAAACTACTGTTGAAGCTACTCCAT  
CTACTGCTACAACGTTTCTGAAGGTGTTGTCACTGAATACGTTACTTACTGTCCAGTTTCTTCC  
GTTGAAACCGTTGCTTCTACAAAGGTCATTACTGTTGTTGCTTGTGATGAACATAAGTGCCACGA  
AACTACAGCTGTTGCTACTCCAACGAAGTTACAACAGTTGTTGAAGGTTCCACCACTCATTATG  
TTACTTATAAGCCAACAGGTTCCGGTCCAACCTCAAGGTGAAACTTATGCTACTAATGCCATCACA  
AGTGAAGGTACAGTTTACGTTCCAAAGACTACTGCTGTTACTACACATGGTTCTACTTTTGAAAC  
TGTCGCCTACATTACAGTTACTAAGGCTACACCAACAAAAGGTGGTGAACAACATCAACCAGGTT  
CTCCAGCTGGTGCCGCTACTTCTGCTCCAGGTGCTCCTGCTCCTGGTGCATCTGGTGCTCATGCT  
TCAACTGCTAACAAGTTACCGTTGAAGCTCAAGCTACACCAGGTACTTTGACTCCAGAAAACAC  
AGTTGCCGGTGGTGTAAACGGTGAACAAGTAGCTGTTTCTGCTAAGACTACTATTTCTCAAACCTA  
CCGTCGCTAAAGCTTCAGGTTTCAGGTAAAGCTGCTATTTCTACTTTTGAAGGTGCTGCTGCAGCT  
TCCGCTGGTGCTTCTGTTTTAGCTTTGGCTTTGATTCCATTGGCCTACTTTCATTTGAGTCGACAT  
CTTATACGACTA

### Amplification Primers for above sequence:

Forward:

5' -AGCGATCATGTCTAGATGAAGGTTTCCACT-3'

Reverse:

5' -TAGTCGTATAAGATGTGCGACTCAAATGAAGTAGGCCA-3'

**Supplementary Data 2. The *Sc-CaYWP1* gene and amplification primers were custom-synthesized using Invitrogen™ GeneArt™ Strings™ DNA Fragment Service.**

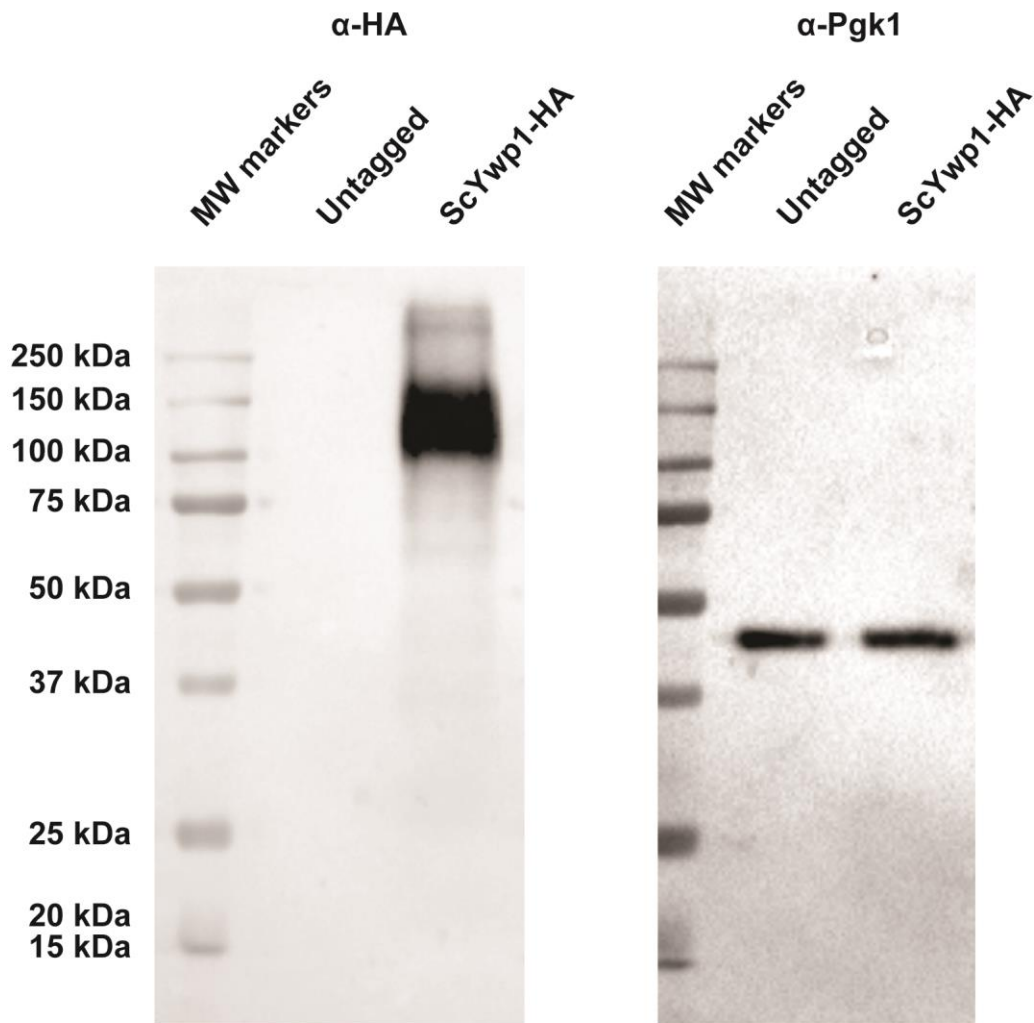

**Supplementary Figure 1. Heterologous expression of *Sc-CaYWP1* in *S. cerevisiae*.**

Immunoblot analysis of untagged (PC7155) and HA-epitope tagged *Sc-CaYwp1* expressed from *TEF2* promoter on a high-copy plasmid (PC7307) in wild-type *S. cerevisiae* (PC538). The HA-*Sc-CaYwp1* protein may run at a higher molecular weight (150 kDa) than its expected size (61 kDa) due to glycosyl modifications. Antibodies to Pgk1 (45 kDa) were used as a control for total protein levels.

| Name                               | Strain     | Genotype, Reference                                                                                                                                                                                                                                        |
|------------------------------------|------------|------------------------------------------------------------------------------------------------------------------------------------------------------------------------------------------------------------------------------------------------------------|
| <i>Candida albicans</i><br>WT      | CA14 + URA | $\Delta$ ura3::imm434/ $\Delta$ ura3::imm434, RPS1/ $\Delta$ rps1::Clp10-URA3, <sup>1</sup>                                                                                                                                                                |
| SN250                              | SN250      | his1 $\Delta$ /his1 $\Delta$ , leu2 $\Delta$ /leu2 $\Delta$ , arg4 $\Delta$ /arg4 $\Delta$ , URA3/ura3 $\Delta$ ::imm434, IRO1/iro1 $\Delta$ ::imm434, <sup>2</sup>                                                                                        |
| $\Delta/\Delta$ als1/3             | CJN1348    | ura3 $\Delta$ ::imm434:: URA3-IRO1 als1::hisG als3::dpl200<br>ura3 $\Delta$ ::imm434 als1::hisG als3::dpl200, <sup>3</sup>                                                                                                                                 |
| $\Delta$ bcr1                      | SN275      | his1 $\Delta$ /his1 $\Delta$ , leu2 $\Delta$ /leu2 $\Delta$ , arg4 $\Delta$ /arg4 $\Delta$ , URA3/ura3 $\Delta$ ::imm434, IRO1/iro1 $\Delta$ ::imm434,<br>bcr1 $\Delta$ :: <i>C.dubliniensis</i> HIS1/bcr1 $\Delta$ :: <i>C.maltosa</i> LEU2, <sup>2</sup> |
| $\Delta$ efg1                      | TF156-X    | his1 $\Delta$ /his1 $\Delta$ , leu2 $\Delta$ /leu2 $\Delta$ , arg4 $\Delta$ /arg4 $\Delta$ , URA3/ura3 $\Delta$ ::imm434, IRO1/iro1 $\Delta$ ::imm434,<br>efg1 $\Delta$ :: <i>C.dubliniensis</i> HIS1/efg1 $\Delta$ :: <i>C.maltosa</i> LEU2, <sup>4</sup> |
| $\Delta$ hog1                      | SN307      | his1 $\Delta$ /his1 $\Delta$ , leu2 $\Delta$ /leu2 $\Delta$ , arg4 $\Delta$ /arg4 $\Delta$ , URA3/ura3 $\Delta$ ::imm434, IRO1/iro1 $\Delta$ ::imm434,<br>hog1 $\Delta$ :: <i>C.dubliniensis</i> HIS1/hog1 $\Delta$ :: <i>C.maltosa</i> LEU2, <sup>2</sup> |
| $\Delta$ hwp2                      | SN73       | his1 $\Delta$ /his1 $\Delta$ , leu2 $\Delta$ /leu2 $\Delta$ , arg4 $\Delta$ /arg4 $\Delta$ , URA3/ura3 $\Delta$ ::imm434, IRO1/iro1 $\Delta$ ::imm434,<br>hwp2 $\Delta$ :: <i>C.dubliniensis</i> HIS1/hwp2 $\Delta$ :: <i>C.maltosa</i> LEU2, <sup>2</sup> |
| $\Delta$ hyr1                      | SN823      | his1 $\Delta$ /his1 $\Delta$ , leu2 $\Delta$ /leu2 $\Delta$ , arg4 $\Delta$ /arg4 $\Delta$ , URA3/ura3 $\Delta$ ::imm434, IRO1/iro1 $\Delta$ ::imm434,<br>hyr1 $\Delta$ :: <i>C.dubliniensis</i> HIS1/hyr1 $\Delta$ :: <i>C.maltosa</i> LEU2, <sup>2</sup> |
| $\Delta$ ihd1                      | SN917      | his1 $\Delta$ /his1 $\Delta$ , leu2 $\Delta$ /leu2 $\Delta$ , arg4 $\Delta$ /arg4 $\Delta$ , URA3/ura3 $\Delta$ ::imm434, IRO1/iro1 $\Delta$ ::imm434,<br>ihd1 $\Delta$ :: <i>C.dubliniensis</i> HIS1/ihd1 $\Delta$ :: <i>C.maltosa</i> LEU2, <sup>2</sup> |
| $\Delta$ sfl1                      | TF001-X    | his1 $\Delta$ /his1 $\Delta$ , leu2 $\Delta$ /leu2 $\Delta$ , arg4 $\Delta$ /arg4 $\Delta$ , URA3/ura3 $\Delta$ ::imm434, IRO1/iro1 $\Delta$ ::imm434,<br>sfl1 $\Delta$ :: <i>C.dubliniensis</i> HIS1/sfl1 $\Delta$ :: <i>C.maltosa</i> LEU2, <sup>4</sup> |
| $\Delta$ ywp1                      | SN630      | his1 $\Delta$ /his1 $\Delta$ , leu2 $\Delta$ /leu2 $\Delta$ , arg4 $\Delta$ /arg4 $\Delta$ , URA3/ura3 $\Delta$ ::imm434, IRO1/iro1 $\Delta$ ::imm434,<br>ywp1 $\Delta$ :: <i>C.dubliniensis</i> HIS1/ywp1 $\Delta$ :: <i>C.maltosa</i> LEU2, <sup>2</sup> |
| <i>Saccharomyces cerevisiae</i> WT | PC538      | MATa ste4 FUS1-lacZ FUS1-HIS3 ura3-52<br>$\Sigma$ 1278b, <sup>5</sup>                                                                                                                                                                                      |
| Sc $\Delta$ flo11                  | PC1029     | MATa ste4 FUS1-lacZ FUS1-HIS3 ura3-52) flo11::KanMX6 $\Sigma$ 1278b, <sup>6</sup>                                                                                                                                                                          |
| Sc-CaYWP1                          | PC7155     | $\Sigma$ 1278b MATa ste4 FUS1-lacZ FUS1-HIS3 ura3-52 -scYWP1,<br>This paper                                                                                                                                                                                |

**Supplementary Table 1. Strains used in the study.** All deletion strains for *Candida albicans* were homozygous knockouts.  $\Delta/\Delta$ als1/3 is a dual homozygous knockout strain of ALS1 and ALS3.

## References for Supplementary Table 1.

1. Fonzi, W. A. & Irwin, M. Y. Isogenic strain construction and gene mapping in *Candida albicans*. *Genetics* **134**, 717–28 (1993).
2. Noble, S. M., French, S., Kohn, L. A., Chen, V. & Johnson, A. D. Systematic screens of a *Candida albicans* homozygous deletion library decouple morphogenetic switching and pathogenicity. *Nat. Genet.* **42**, 590–8 (2010).
3. Nobile, C. J. *et al.* Complementary adhesin function in *C. albicans* biofilm formation. *Curr. Biol.* **18**, 1017–24 (2008).
4. Homann, O. R., Dea, J., Noble, S. M. & Johnson, A. D. A phenotypic profile of the *Candida albicans* regulatory network. *PLoS Genet.* **5**, e1000783 (2009).
5. Cullen, P. J. *et al.* A signaling mucin at the head of the Cdc42- and MAPK-dependent filamentous growth pathway in yeast. *Genes Dev.* **18**, 1695–708 (2004).
6. Karunanithi, S. *et al.* Shedding of the mucin-like flocculin Flo11p reveals a new aspect of fungal adhesion regulation. *Curr. Biol.* **20**, 1389–95 (2010).

## Supplementary Movie Legends

**Supplementary Movie 1. Adhesion of WT cells under flow at 23°C.** This time-lapse darkfield microscopy movie shows the attachment of CA14 + *URA* cells to the substrate during the attachment phase (time indicated in the upper left hand corner; images acquired every 2 m), followed by the subsequent growth and development during the growth phase (starts at 2h; images acquired every 15 m). Cell-seeded media ( $1 \times 10^6$  cells/ml) was used during the attachment phase, while cell-free media was used during the growth phase. Flow is from the right to left. Scale bar indicates 50  $\mu\text{m}$ .

**Supplementary Movie 2.  $\Delta/\Delta als1/3$  cells have reduced cell-cell adhesion under flow.** This time-lapse darkfield microscopy movie shows the attachment of  $\Delta/\Delta als1/3$  cells to the substrate during the attachment phase (time indicated in the upper left hand corner; images acquired every 2 m), followed by the growth phase (starts at 2h; images acquired every 15 m). Cell-seeded media ( $1 \times 10^6$  cells/ml) was used during the attachment phase, while cell-free media was used during the growth phase. Flow is from the right to left. Scale bar indicates 50  $\mu\text{m}$ .

**Supplementary Movie 3.  $\Delta hyr1$  cells have reduced adhesion under flow.** This time-lapse darkfield microscopy movie shows the attachment of  $\Delta hyr1$  cells to the substrate during the attachment phase (time indicated in the upper left hand corner; images acquired every 2 m), followed by the growth phase (starts at 2h; images acquired every 15 m). Cell-seeded media ( $1 \times 10^6$  cells/ml) was used during the attachment phase, while cell-free media was used during the growth phase. Flow is from the right to left. Scale bar indicates 50  $\mu\text{m}$ .

**Supplementary Movie 4. Only a few  $\Delta hwp2$  cells adhere under flow.** This time-lapse darkfield microscopy movie shows the attachment of  $\Delta hwp2$  cells to the substrate during the attachment phase (time indicated in the upper left hand corner; images acquired every 2 m), followed by the growth phase (starts at 2h; images acquired every 15 m). Cell-seeded media ( $1 \times 10^6$  cells/ml) was used during the attachment phase, while cell-free media was used during the growth phase. This Movie is also reflective of results obtained for  $\Delta eap1$  and  $\Delta ihd1$  cells. Flow is from the right to left. Scale bar indicates 50  $\mu\text{m}$ .

**Supplementary Movie 5.  $\Delta hog1$  cells show robust hyperfilamentation and remain strongly adhered over time under flow.** This time-lapse darkfield microscopy movie shows the attachment of  $\Delta hog1$  cells to the substrate during the attachment phase (time indicated in the upper left hand corner; images acquired every 2 m), followed by the growth phase (starts at 2h; images acquired every 15 m). Cell-seeded media ( $1 \times 10^6$  cells/ml) was used during the attachment phase, while cell-free media was used during the growth phase. Flow is from the right to left. Scale bar indicates 50  $\mu\text{m}$ .

**Supplementary Movie 6.  $\Delta sf11$  cells show robust hyperfilamentation and remain strongly adhered over time under flow.** This time-lapse darkfield microscopy movie shows the attachment of  $\Delta sf11$  cells to the substrate during the attachment phase (time indicated in the upper left hand corner; images acquired every 2 m), followed by the growth phase (starts at 2h; images acquired every 15 m). Cell-seeded media ( $1 \times 10^6$  cells/ml) was used during the attachment phase, while cell-free media was used during the growth phase. Flow is from the right to left. Scale bar indicates 50  $\mu\text{m}$ .

**Supplementary Movie 7.  $\Delta efg1$  cells fail to remain adhered over time under flow.** This time-lapse darkfield microscopy movie shows the attachment of  $\Delta efg1$  cells to the substrate during the attachment phase (time indicated in the upper left hand corner; images acquired every 2 m), followed by the growth phase (starts at 2h; images acquired every 15 m). Cell-seeded media ( $1 \times 10^6$  cells/ml) was used during the attachment phase, while cell-free media was used during the growth phase. Flow is from the right to left. Scale bar indicates 50  $\mu\text{m}$ .

**Supplementary Movie 8.  $\Delta bcr1$  cells fail to remain adhered over time under flow.** This time-lapse darkfield microscopy movie shows the attachment of  $\Delta bcr1$  cells to the substrate during the attachment phase (time indicated in the upper left hand corner; images acquired every 2 m), followed by the growth phase (starts at 2h; images acquired every 15 m). Cell-seeded media ( $1 \times 10^6$  cells/ml) was used during the attachment phase, while cell-free media was used during the growth phase. Flow is from the right to left. Scale bar indicates 50  $\mu\text{m}$ .

**Supplementary Movie 9. WT cells treated with rapamycin (20 nM) have increased adhesion maintenance over time.** This time-lapse darkfield microscopy movie shows the attachment of WT cells to the substrate during the attachment phase (time indicated in the upper left hand corner; images acquired every 2 m), followed by the growth phase (starts at 2h; images acquired every 15 m). Cell-seeded media ( $1 \times 10^6$  cells/ml) with 20 nM rapamycin was used during the attachment phase, while cell-free media with 20 nM rapamycin was used during the growth phase. Flow is from the right to left. Scale bar indicates 50  $\mu\text{m}$ .

**Supplementary Movie 10.  $\Delta ywp1$  cells fail to remain adhered over time.** This time-lapse darkfield microscopy movie shows the attachment of  $\Delta ywp1$  cells to the substrate during the attachment phase (time indicated in the upper left hand corner; images acquired every 2 m), followed by the growth phase (starts at 2h; images acquired every 15 m). Cell-seeded media ( $1 \times 10^6$  cells/ml) was used during the attachment phase, while cell-free media was used during the growth phase. Flow is from the right to left. Scale bar indicates 50  $\mu\text{m}$ .
